# Supplementary material
Source: publisher figshare collection journal article supplement (https://acs.figshare.com/ndownloader/files/3722041)
Supplement: Supplementary file 1 [file 3722041]

# **Sensitive Water Probing through Nonlinear Photon Upconversion of Lanthanide-Doped Nanoparticles**

Shaohong Guo, Xiaoji Xie,\* Ling Huang,\* and Wei Huang\*

*Key Laboratory of Flexible Electronics (KLOFE), Institute of Advanced Materials (IAM),  
Jiangsu National Synergetic Innovation Center for Advanced Materials (SICAM), Nanjing  
Tech University (NanjingTech), Nanjing 211816, China*

*Key Laboratory for Organic Electronics and Information Displays, Institute of Advanced  
Materials, Jiangsu National Synergetic Innovation Center for Advanced Materials (SICAM),  
Nanjing University of Posts & Telecommunications, Nanjing 210023, China*

*\* Email: iamxjxie@njtech.edu.cn; iamlhuang@njtech.edu.cn; iamwhuang@njtech.edu.cn.*

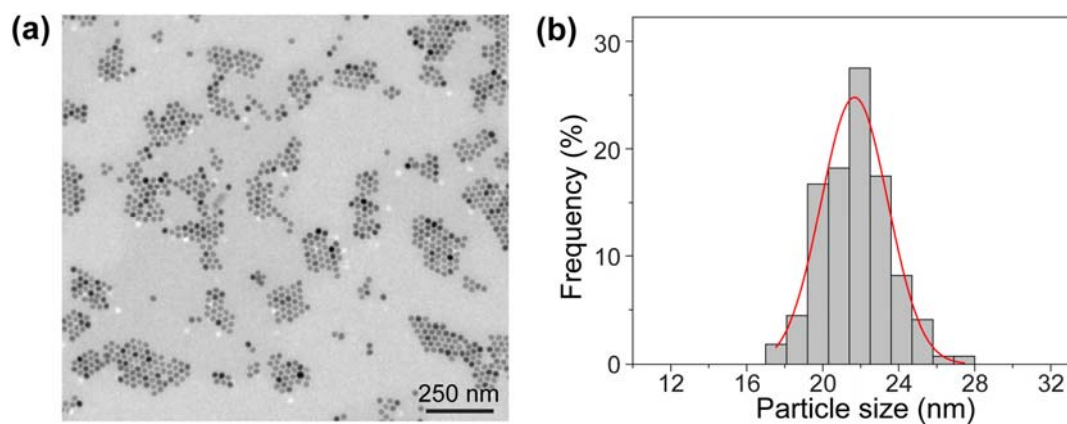

**Figure S1.** (a) TEM image and (b) corresponding size distribution of the oleic acid capped  $\text{NaYF}_4:\text{Yb/Er}(18/2 \text{ mol } \%)$  nanoparticles.

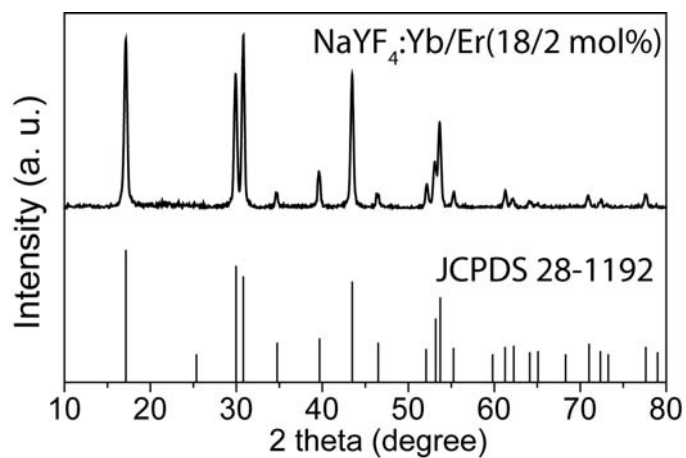

**Figure S2.** XRD pattern of the as-synthesized  $\text{NaYF}_4:\text{Yb/Er}(18/2 \text{ mol } \%)$  nanoparticles. The diffraction pattern at the bottom is the literature reference for hexagonal  $\text{NaYF}_4$  crystal (Joint Committee on Powder Diffraction Standards file number 28-1192).

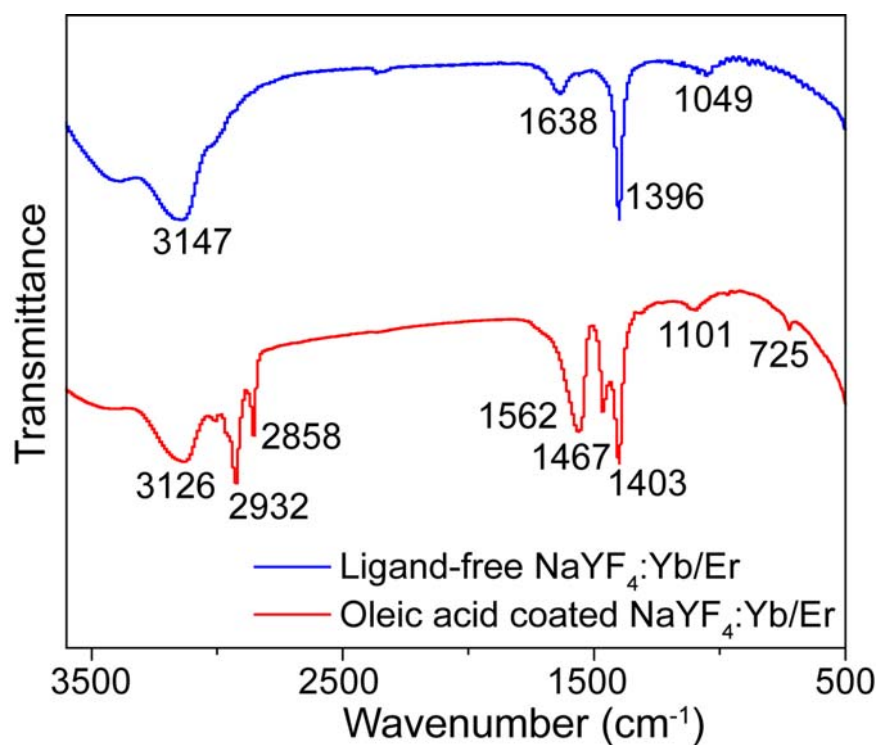

**Figure S3.** FTIR spectra of oleic acid coated NaYF<sub>4</sub>:Yb/Er and corresponding ligand-free nanoparticles, respectively. The disappearance of the peaks at 2932, 2858, 1562, and 1467 cm<sup>-1</sup> indicates the successful removal of oleic acid.

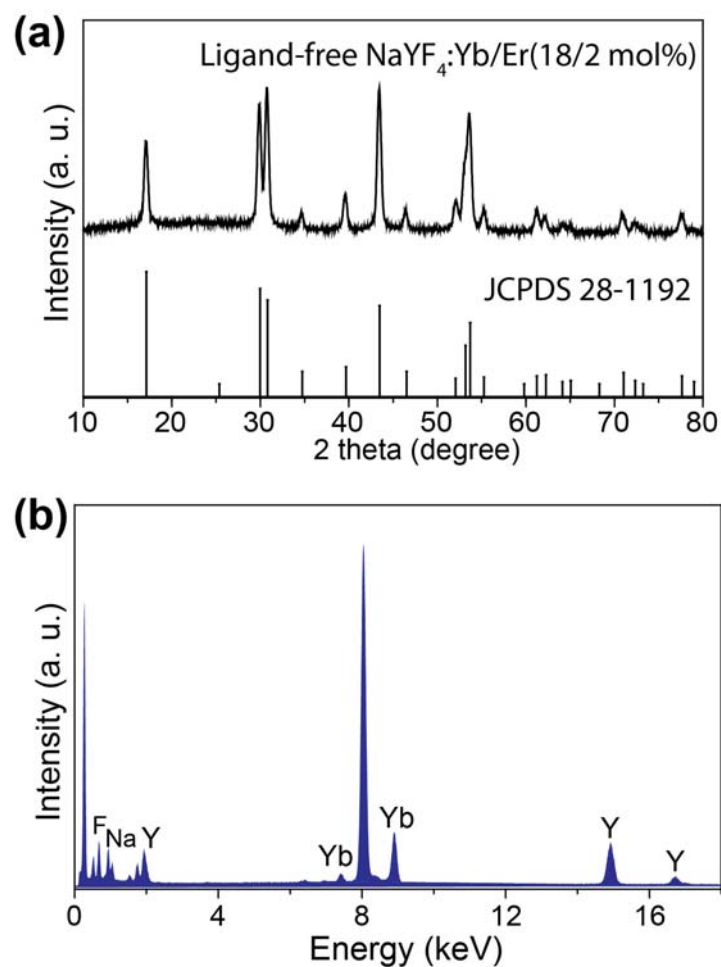

**Figure S4.** (a) XRD pattern of ligand-free  $\text{NaYF}_4\text{:Yb/Er(18/2 mol \%)}$  nanoparticles. The diffraction pattern at the bottom is the literature reference for hexagonal  $\text{NaYF}_4$  crystal (Joint Committee on Powder Diffraction Standards file number 28-1192). (b) The energy dispersive X-ray spectrum of the ligand-free  $\text{NaYF}_4\text{:Yb/Er(18/2 mol \%)}$  nanoparticles, indicating the existence of  $\text{Na}^+$ ,  $\text{F}^-$ ,  $\text{Y}^{3+}$ , and  $\text{Yb}^{3+}$ .

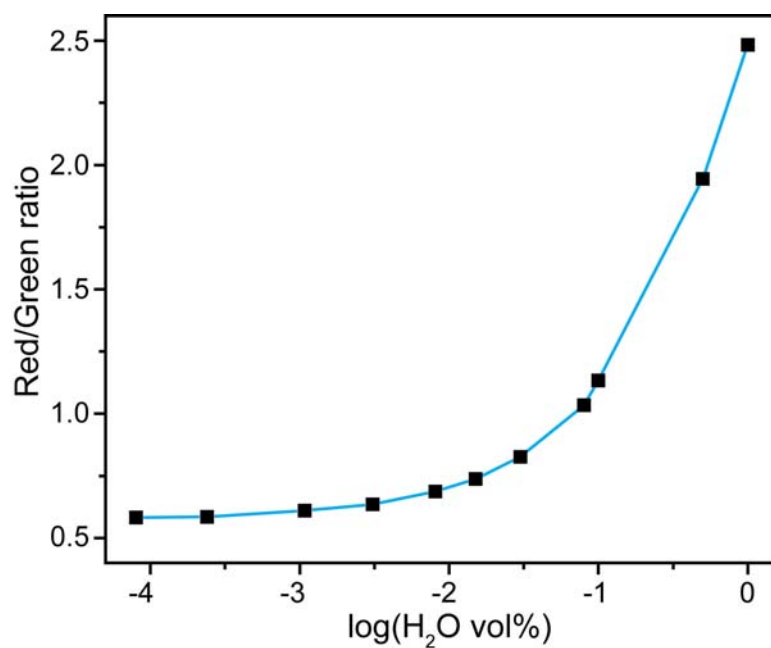

**Figure S5.** Integrated ratio of red-to-green emission of ligand-free NaYF<sub>4</sub>:Yb/Er nanoparticles as a function of H<sub>2</sub>O concentration (0.008-100 vol %). The concentration of ligand-free nanoparticles was 0.1 mg/mL. Note that the integrated intensity of red and green emission are from the <sup>2</sup>H<sub>11/2</sub> (<sup>4</sup>S<sub>3/2</sub>) to <sup>4</sup>I<sub>15/2</sub> and <sup>4</sup>F<sub>9/2</sub> to <sup>4</sup>I<sub>15/2</sub> transitions, respectively.

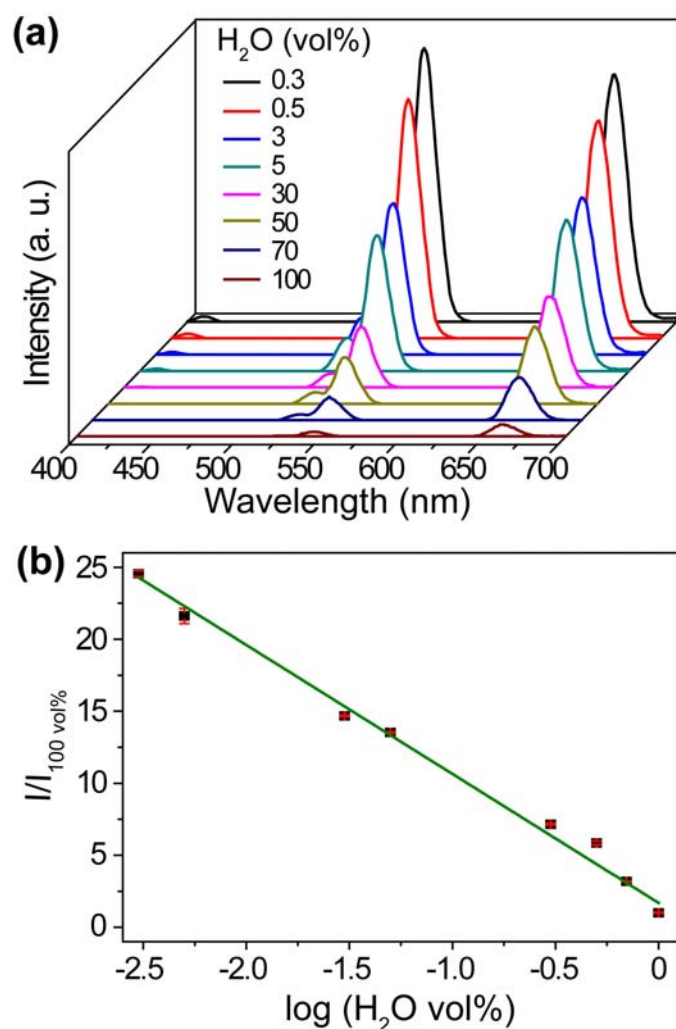

**Figure S6.** (a) Upconversion emission changes of the redispersed ligand-free NaYF<sub>4</sub>:Yb/Er nanoparticles as a function of H<sub>2</sub>O concentration (0.3-100 vol %) in DMF. (b) Corresponding relative emission intensity dependence on H<sub>2</sub>O concentration. Note that the emission intensity was obtained by integrating the emission from 400 to 700 nm. Data are presented as the average from three measurements.

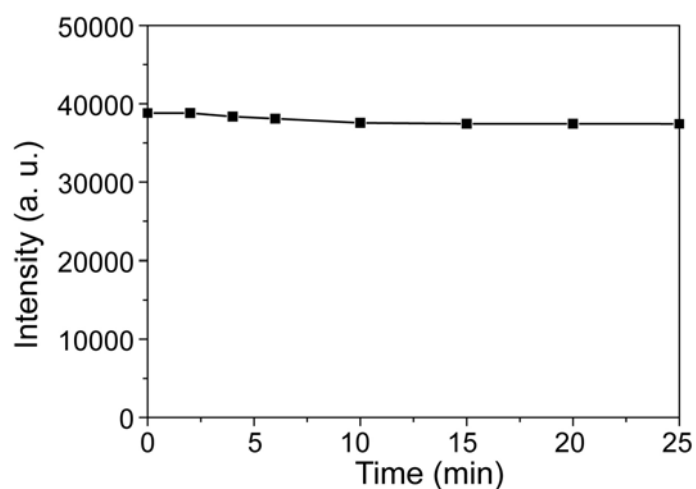

**Figure S7.** The photoluminescence of ligand-free NaYF<sub>4</sub>:Yb/Er nanoparticles in DMF solution containing 10 vol % of water under continuous excitation (980 nm laser) for 25 min.

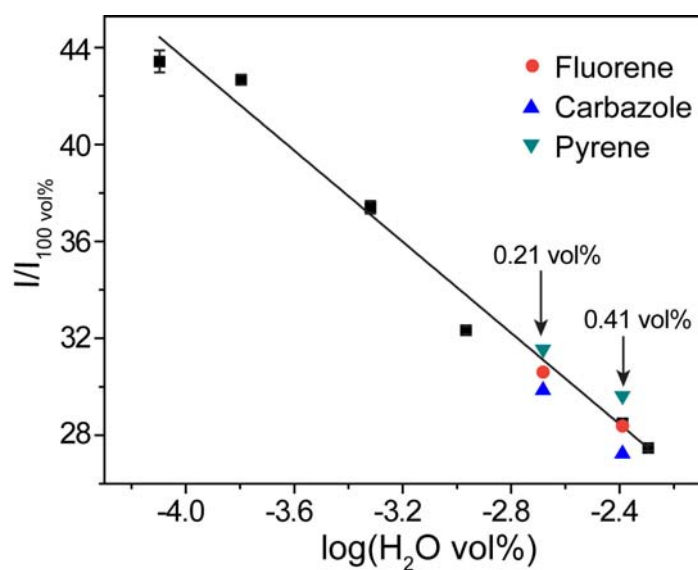

**Figure S8.** The photoluminescence response of ligand-free NaYF<sub>4</sub>:Yb/Er upconversion nanoparticles to DMF solution containing organic dye disruptors (Fluorene: 12  $\mu$ M, Carbazole: 24  $\mu$ M, Pyrene: 10  $\mu$ M). Upconversion emission response to DMF containing both H<sub>2</sub>O (0.21 and 0.408 vol %) and organic dyes is almost in line with the calibration curve, indicating small influence of the organic dyes on water probing.

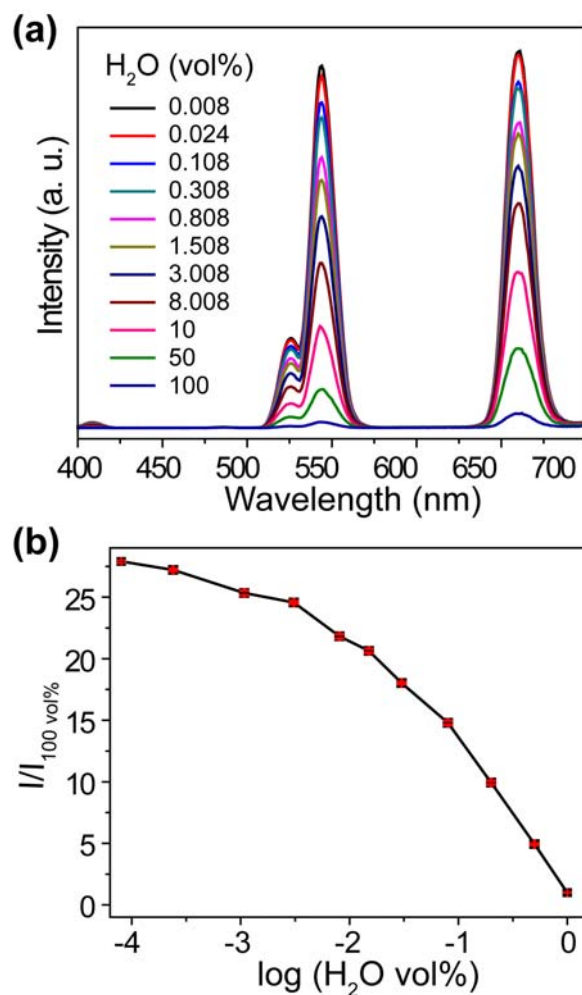

**Figure S9.** (a) Upconversion emission changes of ligand-free NaYF<sub>4</sub>:Yb/Er nanoparticles as a function of H<sub>2</sub>O concentration (0.008-100 vol %) in DMSO. (b) Corresponding relative emission intensity dependence on H<sub>2</sub>O concentration. Note that the emission intensity was obtained by integrating the emission from 400 to 700 nm. The line serves as a guide to the eye and data are presented as the average from three measurements.



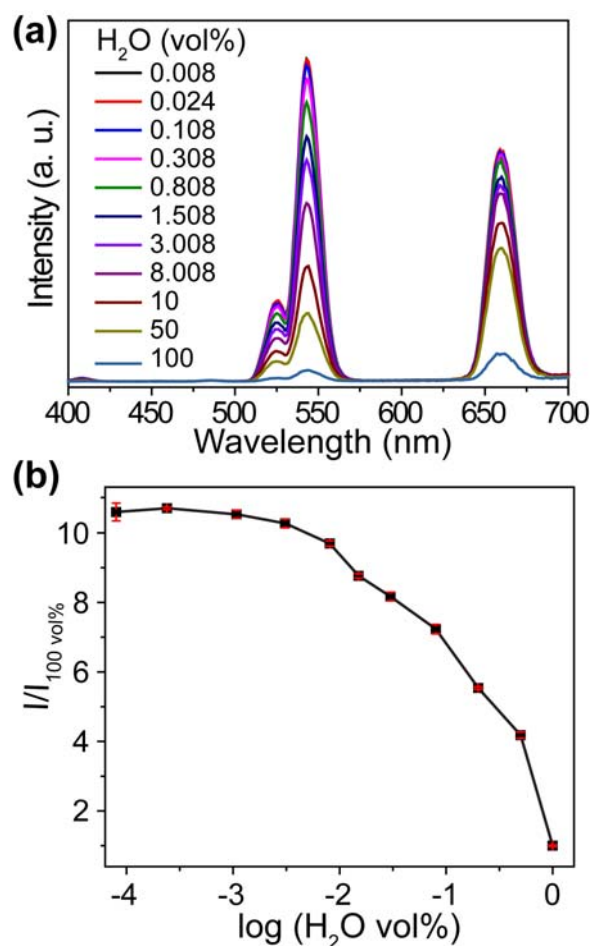

**Figure S10.** (a) Upconversion emission changes of ligand-free NaYF<sub>4</sub>:Yb/Er nanoparticles as a function of H<sub>2</sub>O concentration (0.008-100 vol %) in ethanol. (b) Corresponding relative emission intensity dependence on H<sub>2</sub>O concentration. Note that the emission intensity was obtained by integrating the emission from 400 to 700 nm. The line serves as a guide to the eye and data are presented as the average from three measurements.

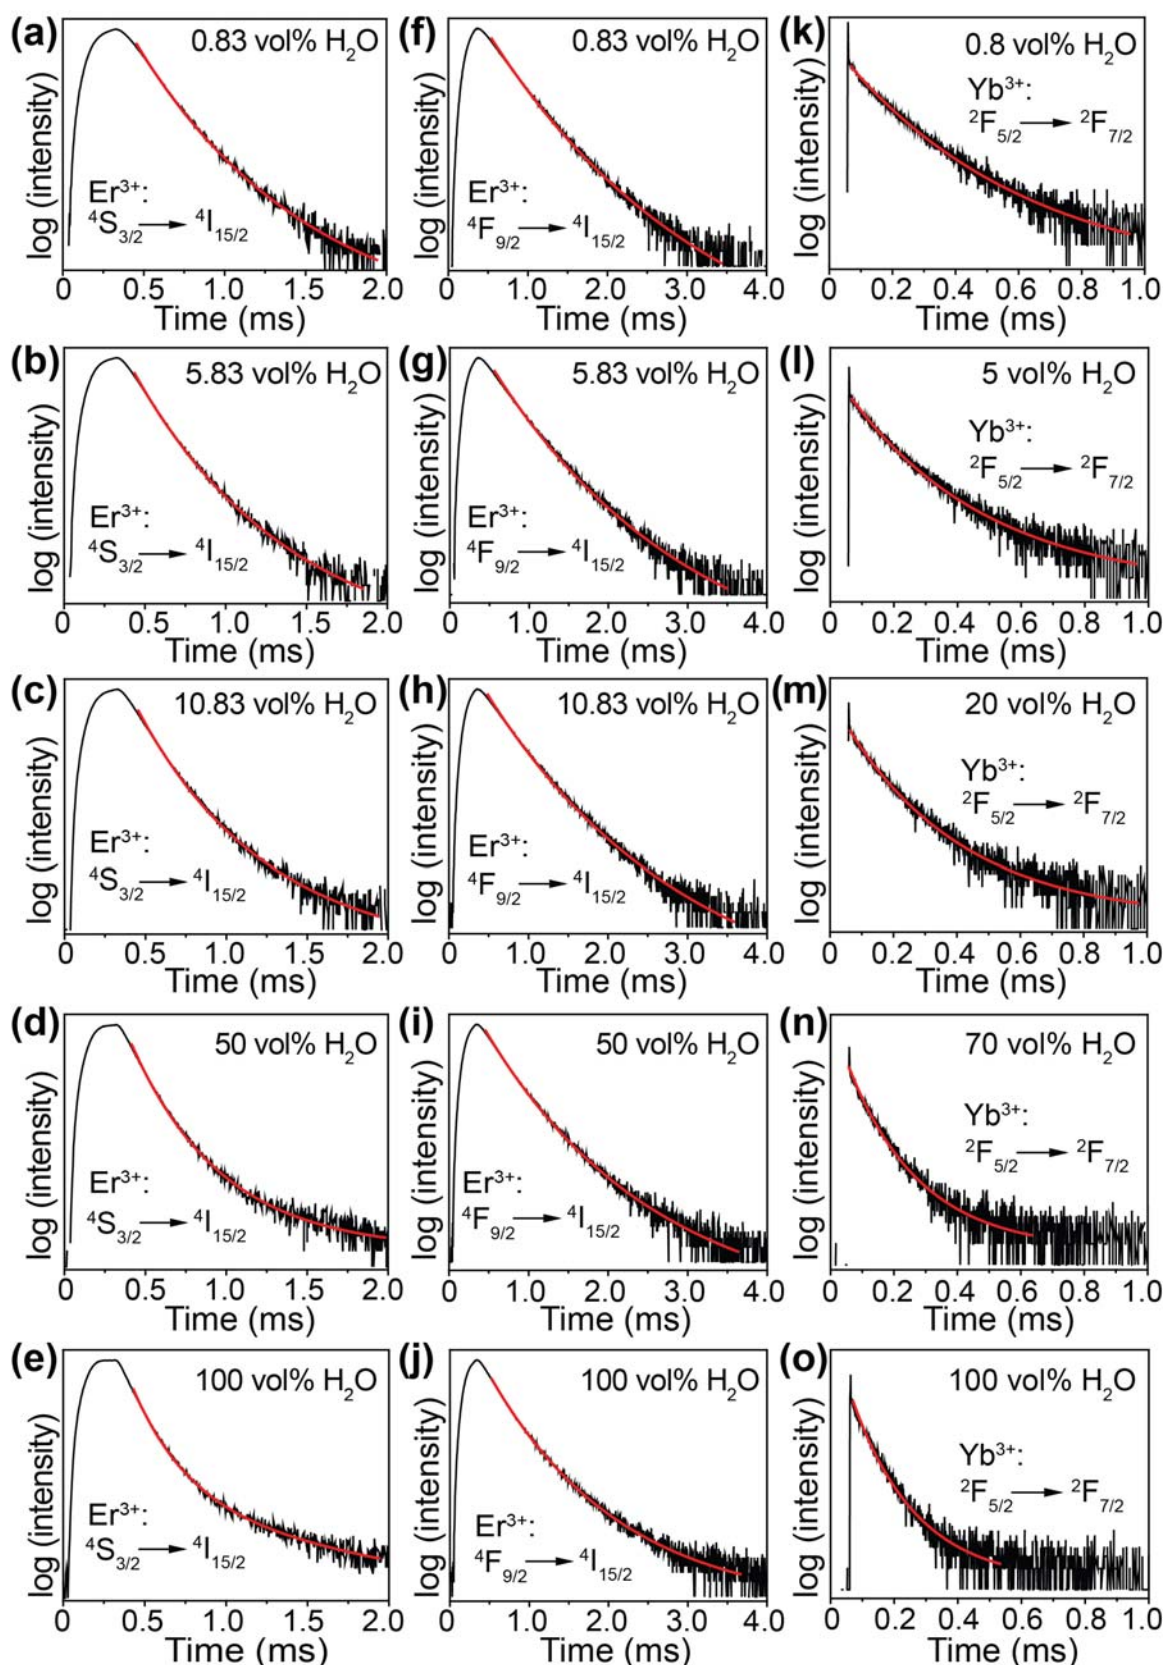

**Figure S11.** Upconversion luminescence decay curves of ligand-free NaYF<sub>4</sub>:Yb/Er nanoparticles dispersed in DMF containing varied water content. (a-j) Decay curves of Er<sup>3+</sup> measured at (a-e) 540 and (f-j) 654 nm (excitation: 980 nm), respectively. The water

concentration was 0.83, 5.83, 10.83, 50 and 100 vol %, respectively. (k-o) Decay curves of  $\text{Yb}^{3+}$  measured at 985 nm (excitation: 975 nm). The water concentration was 0.8, 5, 20, 70 and 100 vol %, respectively. Note that the red curve in each profile is the fitting curve.

**Table S1.** Decay time of  $\text{Er}^{3+}$  emission transitions in ligand-free  $\text{NaYF}_4:\text{Yb}/\text{Er}$  nanoparticles<sup>a</sup>

| Water content<br>(vol%) | Lifetime of green emission<br>( $\mu\text{s}$ ) | Lifetime of red emission<br>( $\mu\text{s}$ )  |
|-------------------------|-------------------------------------------------|------------------------------------------------|
| 0.83                    | $\tau_1$ : 96 (97.6%), $\tau_2$ : 270 (2.4%)    | $\tau_1$ : 200 (97.7%), $\tau_2$ : 960 (2.3%)  |
| 5.83                    | $\tau_1$ : 84 (97.1%), $\tau_2$ : 160 (10.9%)   | $\tau_1$ : 190 (94.5%), $\tau_2$ : 480 (5.5%)  |
| 10.83                   | $\tau_1$ : 77 (80.3%), $\tau_2$ : 140 (19.7%)   | $\tau_1$ : 190 (93.3%), $\tau_2$ : 420 (6.7%)  |
| 50                      | $\tau_1$ : 69 (85.2%), $\tau_2$ : 150 (14.8%)   | $\tau_1$ : 170 (83.3%), $\tau_2$ : 320 (16.7%) |
| 100                     | $\tau_1$ : 64 (84.4%), $\tau_2$ : 150 (15.6%)   | $\tau_1$ : 140 (76.3%), $\tau_2$ : 280 (23.7%) |

<sup>a</sup>The decay curves were analyzed and fitted by XPFit fitting software.

**Table S2.** Decay time of  $\text{Yb}^{3+}$  emission in ligand-free  $\text{NaYF}_4:\text{Yb}/\text{Er}$  nanoparticles<sup>a</sup>

| Water content<br>(vol%) | Lifetime of $\text{Yb}^{3+}$<br>( $\mu\text{s}$ ) |
|-------------------------|---------------------------------------------------|
| 0.8                     | 89                                                |
| 5                       | 82                                                |
| 20                      | 74                                                |
| 70                      | 56                                                |
| 100                     | 50                                                |

<sup>a</sup>The decay curves were analyzed and fitted by XPFit fitting software.

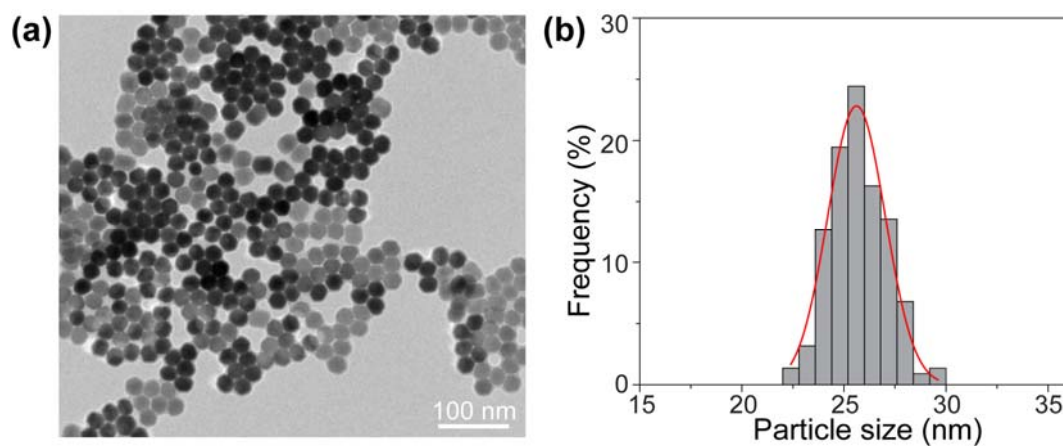

**Figure S12.** (a) TEM image and (b) corresponding size distribution of the ligand-free  $\text{NaYF}_4:\text{Yb/Er}(18/2 \text{ mol } \%)\text{@NaYF}_4$  core-shell nanoparticles.

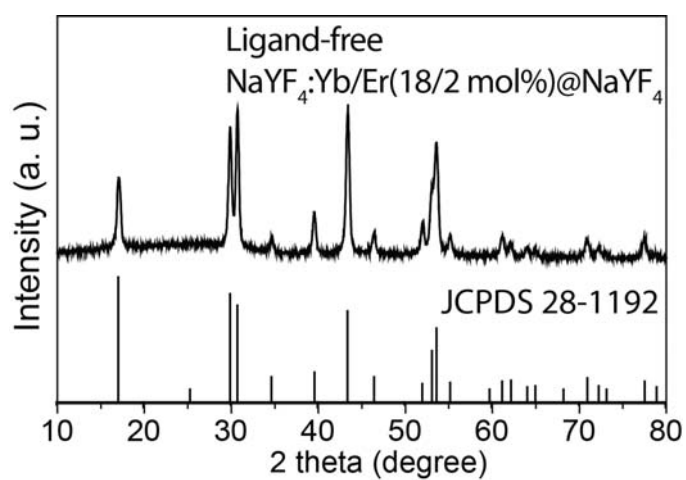

**Figure S13.** XRD pattern of ligand-free  $\text{NaYF}_4:\text{Yb/Er}(18/2 \text{ mol } \%)\text{@NaYF}_4$  core-shell nanoparticles. The diffraction pattern at the bottom is the literature reference for hexagonal  $\text{NaYF}_4$  crystal (Joint Committee on Powder Diffraction Standards file number 28-1192).

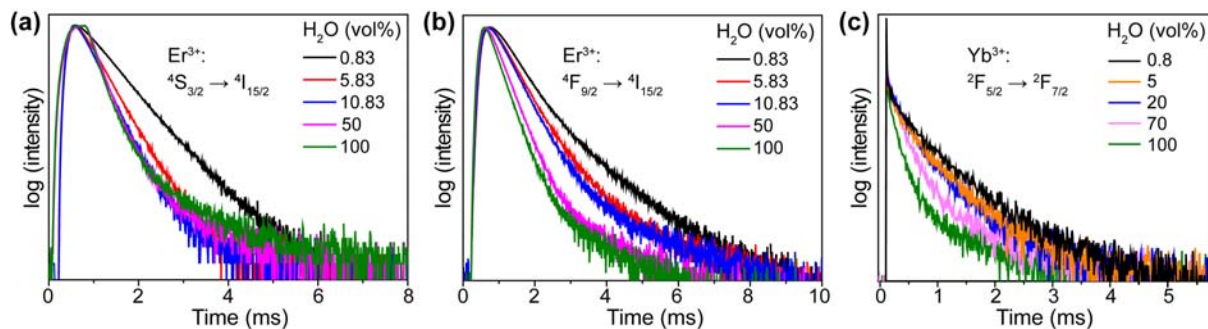

**Figure S14.** Upconversion luminescence decay curves of ligand-free NaYF<sub>4</sub>:Yb/Er@NaYF<sub>4</sub> core-shell nanoparticles dispersed in DMF containing varied water contents. (a, b) Decay curves of Er<sup>3+</sup> measured at 540 nm and 654 nm (excitation: 980 nm), respectively. The water concentration was 0.83, 5.83, 10.83, 50 and 100 vol %, respectively. (c) Decay curves of Yb<sup>3+</sup> measured at 985 nm (excitation: 975 nm). The water concentration was 0.8, 5, 20, 70 and 100 vol %, respectively.

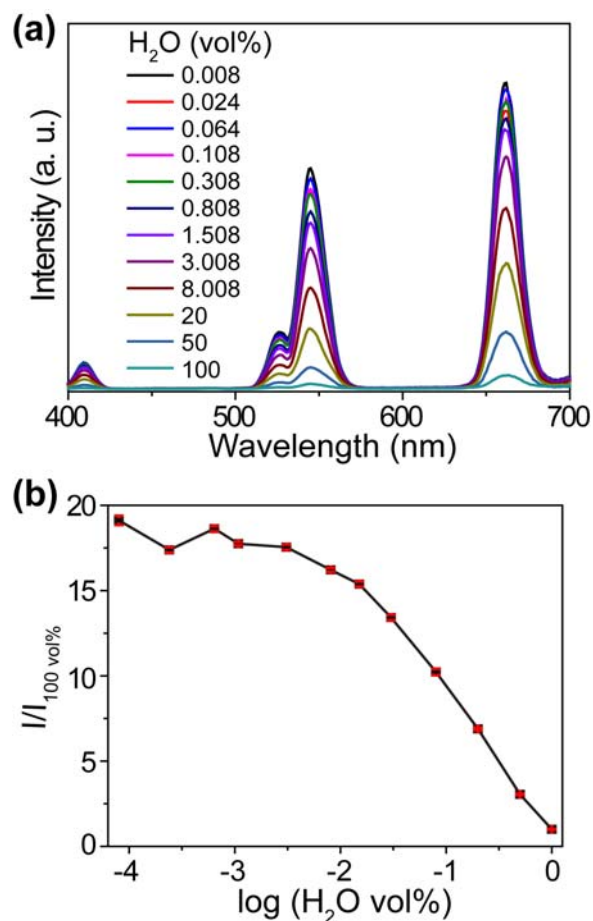

**Figure S15.** (a) Upconversion emission changes of ligand-free NaYF<sub>4</sub>:Yb/Er@NaYF<sub>4</sub> core-shell nanoparticles as a function of H<sub>2</sub>O concentration (0.008-100 vol %) in DMF. (b) Corresponding emission intensity dependence on H<sub>2</sub>O concentration. Note that the emission intensity was obtained by integrating the emission from 400 to 700 nm. The line serves as a guide to the eye and data are presented as the average from three measurements.

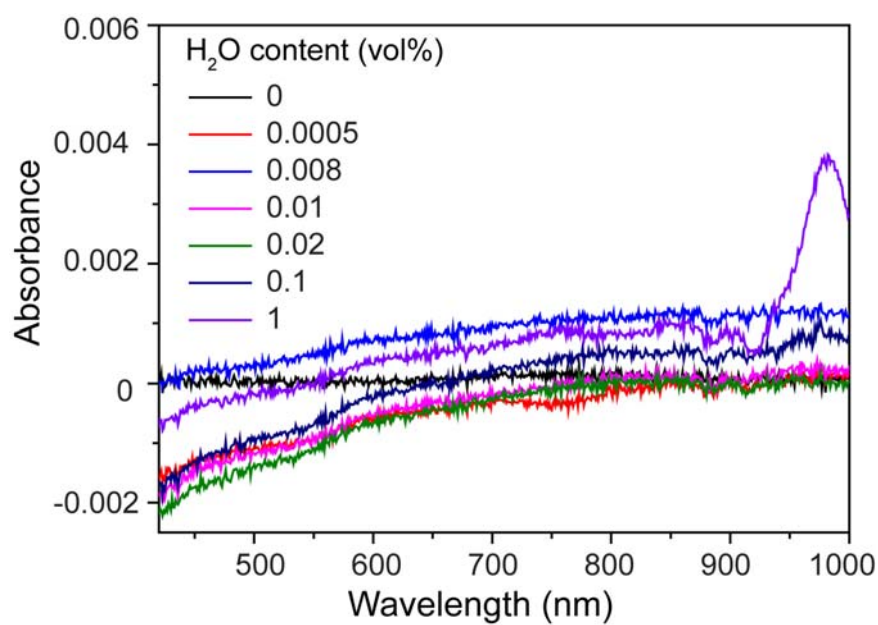

**Figure S16.** Absorption spectra of DMF containing varied water content (0-1 vol %).

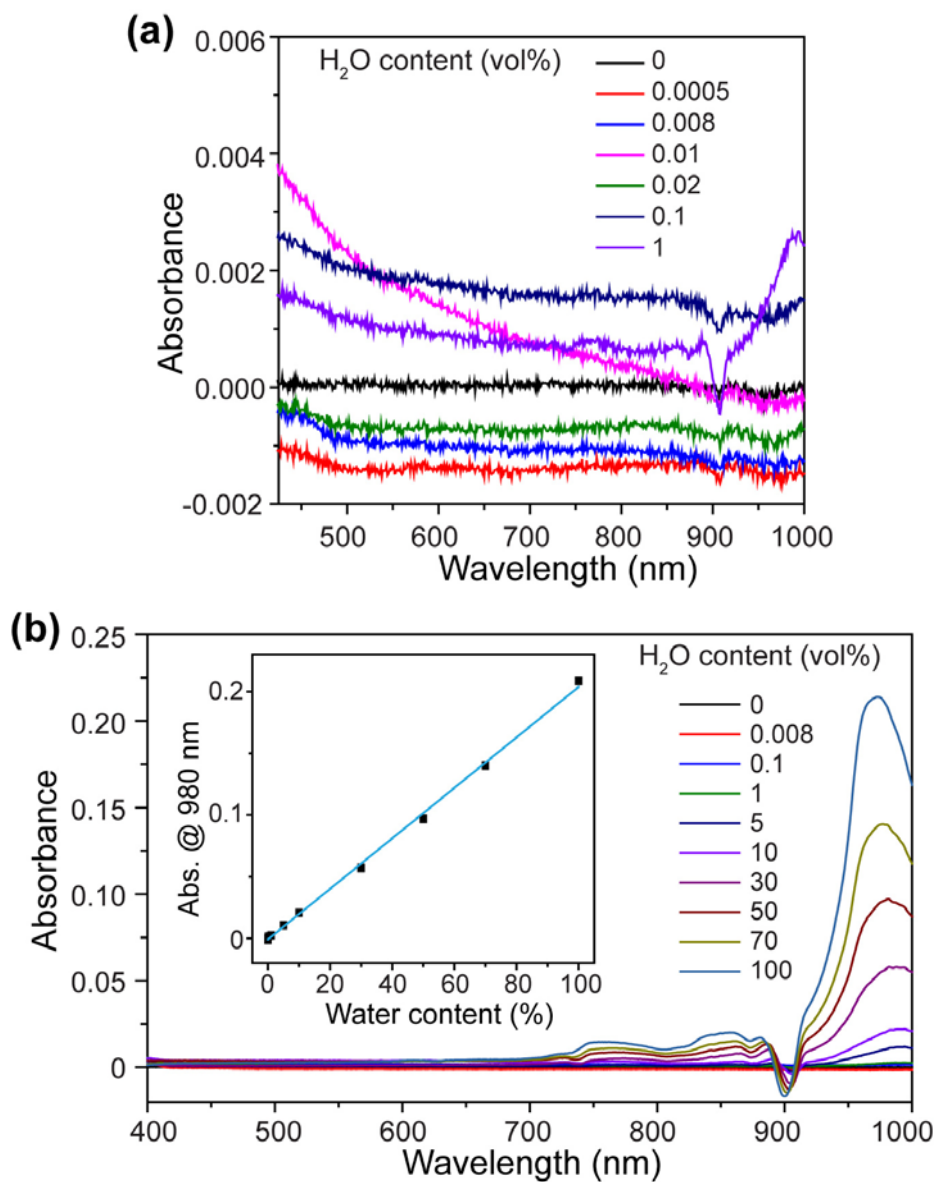

**Figure S17.** Absorption spectra of DMSO containing varied water content: (a) water content ranging from 0 to 1 vol %; (b) water content ranging from 0 to 100 vol %. The inset in (b) is corresponding absorbance at 980 nm as a function of water content.



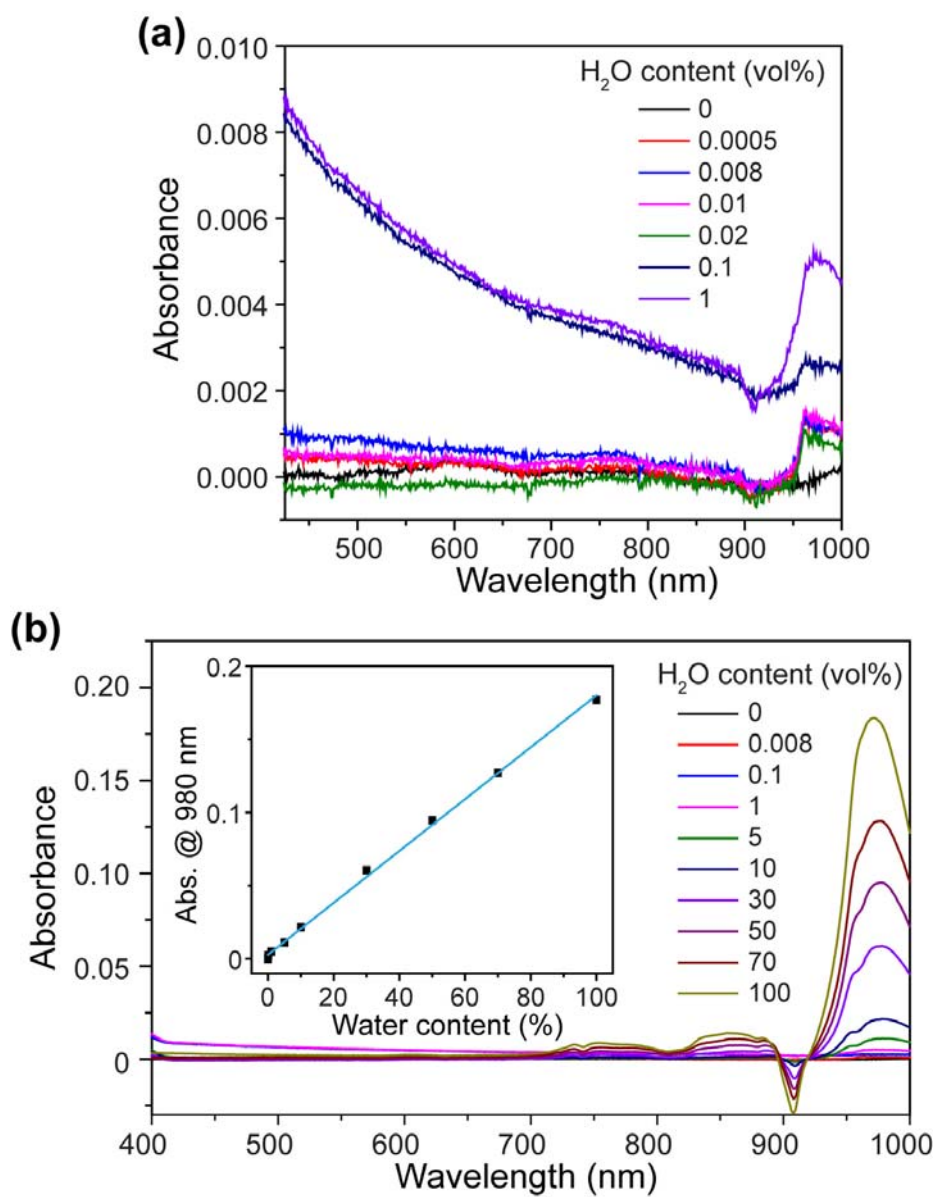

**Figure S18.** Absorption spectra of ethanol containing varied water content: (a) water content ranging from 0 to 1 vol %; (b) water content ranging from 0 to 100 vol %. The inset in (b) is corresponding absorbance at 980 nm as a function of water content.

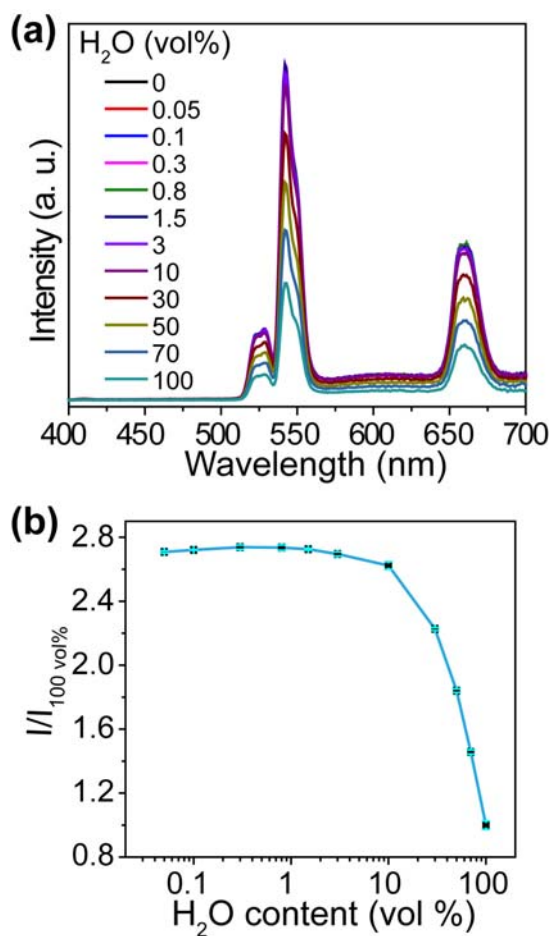

**Figure S19.** (a) Upconversion emission changes of NaYF<sub>4</sub>:Yb/Er@NaYF<sub>4</sub> core-shell nanoparticles as a function of H<sub>2</sub>O concentration (0-100 vol %) in DMSO utilizing noncontact method. (b) Corresponding emission intensity dependence on H<sub>2</sub>O concentration (0.05-100 vol %). Note that the emission intensity was obtained by integrating the emission from 400 to 700 nm. The line serves as a guide to the eye and data are presented as the average from three measurements.

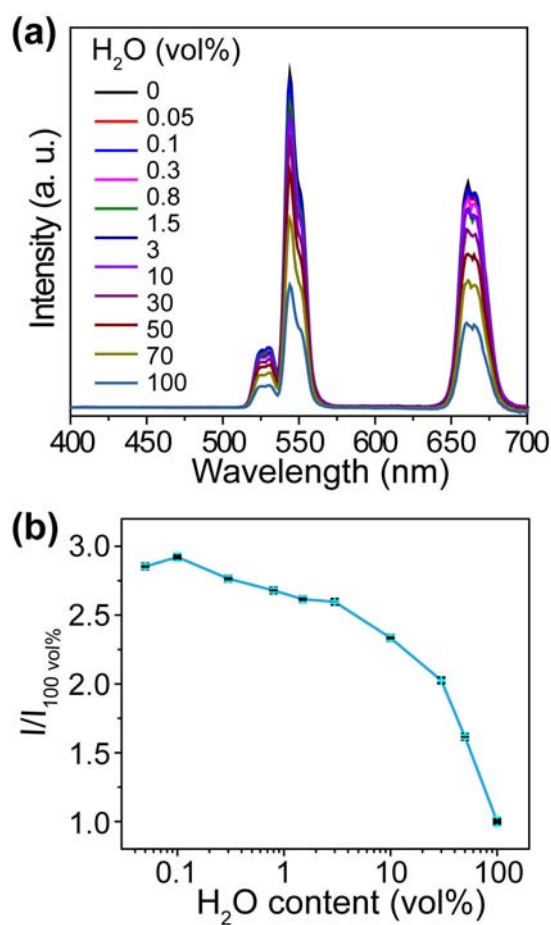

**Figure S20.** (a) Upconversion emission changes of NaYF<sub>4</sub>:Yb/Er@NaYF<sub>4</sub> core-shell nanoparticles as a function of H<sub>2</sub>O concentration (0-100 vol %) in ethanol utilizing noncontact method. (b) Corresponding emission intensity dependence on H<sub>2</sub>O concentration (0.05-100 vol %). Note that the emission intensity was obtained by integrating the emission from 400 to 700 nm. The line serves as a guide to the eye and data are presented as the average from three measurements.
